# Supplementary material for: Copper rubidium diphosphate, Rb2Cu3(P2O7)2: synthesis, crystal structure, thermodynamic and resonant properties
Source: Royal Society of Chemistry journal article supplement (doi:10.1039/c3nj00422h), 2013-01-01
Supplement: c3nj00422h_2.pdf [file c3nj00422h_2.pdf]

## New Journal of Chemistry

### ELECTRONIC SUPPLEMENTARY MATERIALS

#### Copper rubidium diphosphate, $\text{Rb}_2\text{Cu}_3(\text{P}_2\text{O}_7)_2$ : synthesis, crystal structure, thermodynamic and resonant properties

Larisa Shvanskaya,<sup>a\*</sup> Olga Yakubovich,<sup>a</sup> Anna Ivanova,<sup>b</sup> Santu Baidya,<sup>c</sup> Tanusri Saha-Dasgupta,<sup>c</sup> Elena Zvereva,<sup>d</sup> Alexey Golovanov,<sup>d</sup> Olga Volkova,<sup>d</sup> and Alexander Vasiliev<sup>d</sup>

<sup>a</sup> Department of Crystallography and Crystal Chemistry, Geology Faculty, M. V. Lomonosov Moscow State University, Moscow, Russia.

Tel: +7495 9393850; E-mail: lshvanskaya@mail.ru

<sup>b</sup> Shubnikov Institute of Crystallography, RAS, Moscow, Russia

<sup>c</sup> S. N. Bose National Centre for Basic Sciences, Kolkata, India

<sup>d</sup> Department of Low Temperature Physics and Superconductivity, Physics Faculty, M. V. Lomonosov Moscow State University, Moscow, Russia.

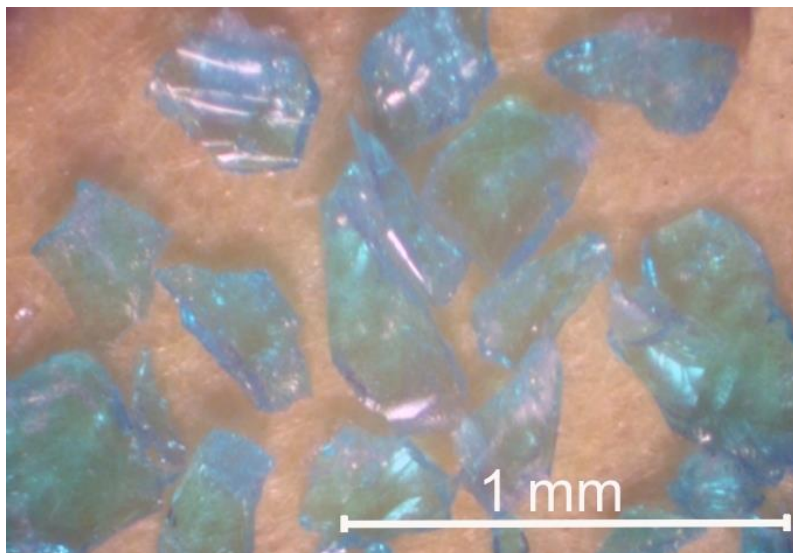

Figure 1. The photograph of  $\text{Rb}_2\text{Cu}_3(\text{P}_2\text{O}_7)_2$  plate-like crystals.
